# Supplementary material
Source: PubMed Central journal article supplement (PMC5721977)

**Supplementary Figure 1: Effect of CBD on electrical resistance (TEER).** 24 h time course TEER measurements shows that CBD  $10^{-7}$ M did not significantly affect electrical resistance as compared to vehicle treated- cells following treatment ( $n=3$ ).

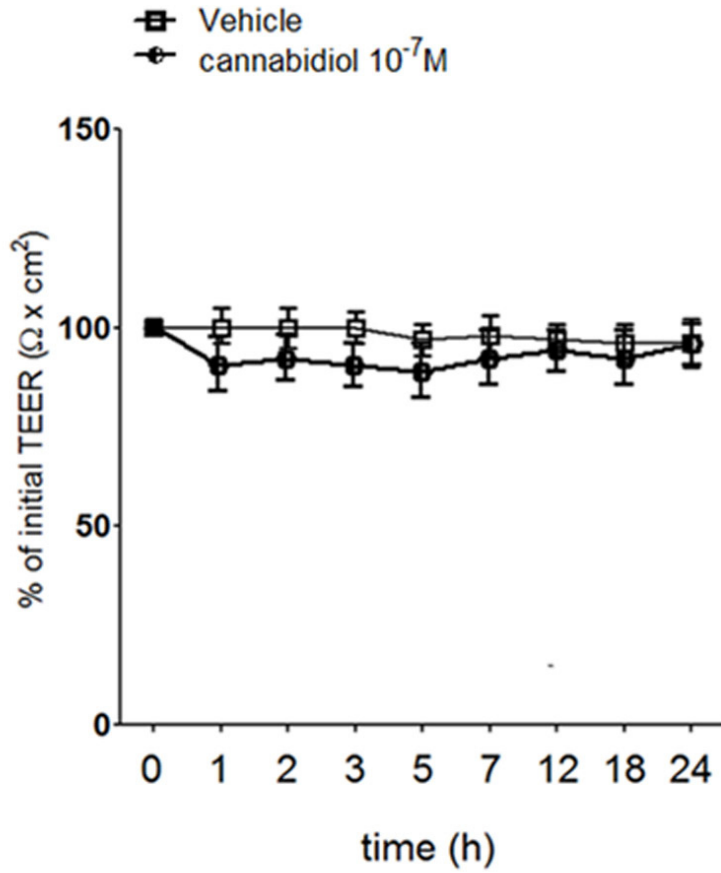

Supplement: supplementary_material.pdf [file supplementary_material.pdf]
